# Supplementary material
Source: Springer Nature journal article supplement (http://www.springermedizin.de/resource/supplementary/13019_2006_4_MOESM2_ESM.pdf/9637110)

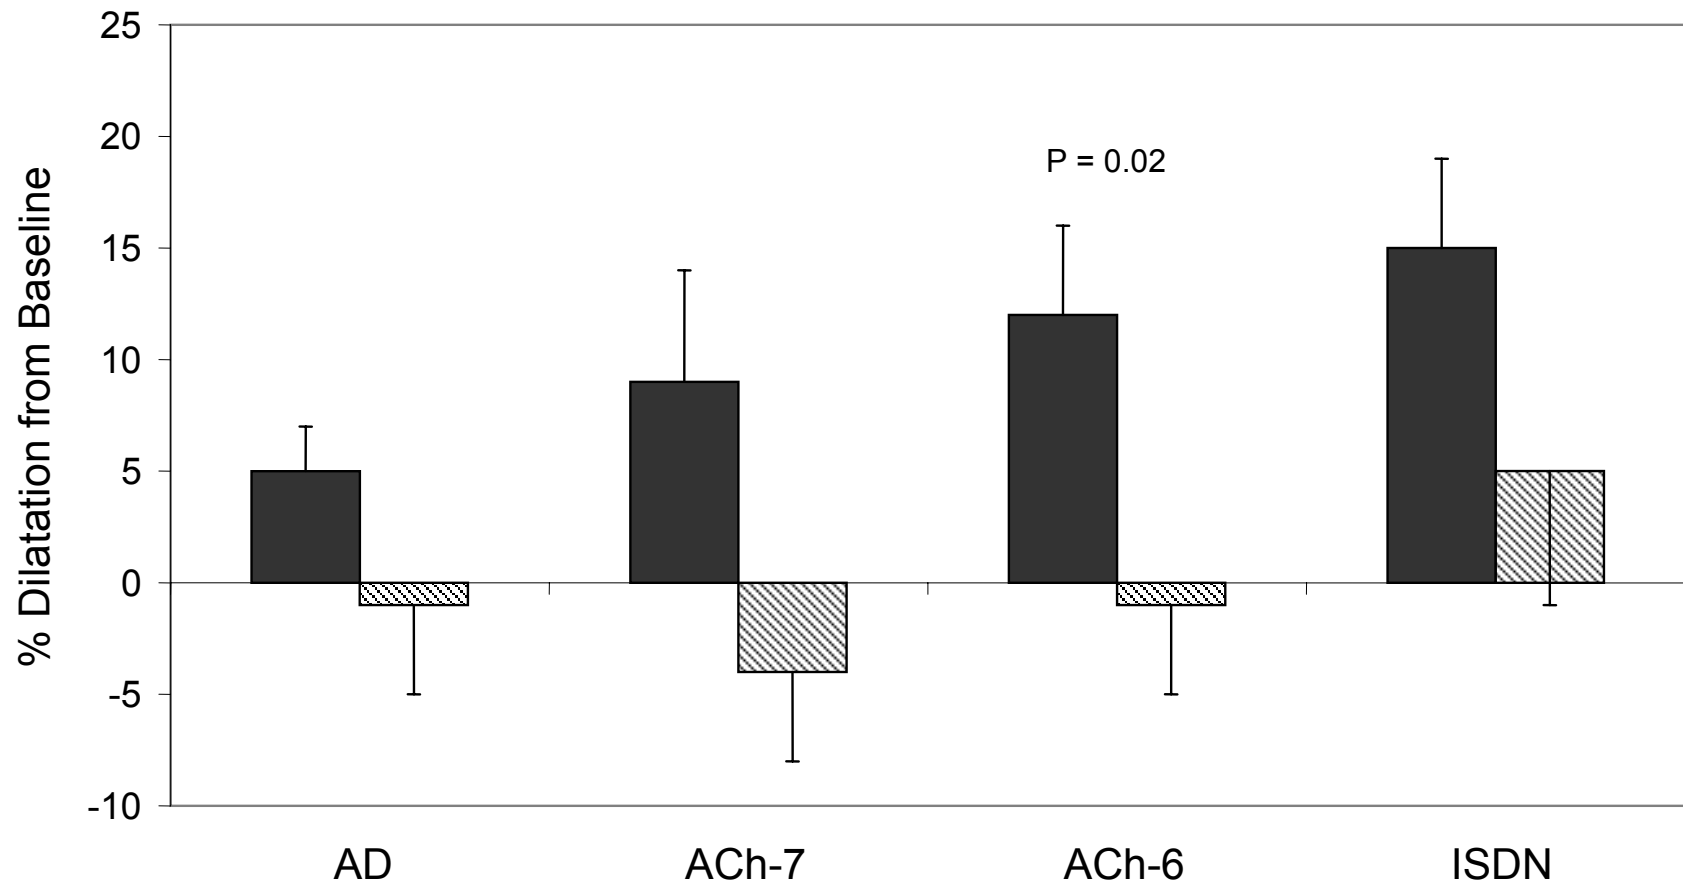

Supplement: MOESM2 [file 9637110]
